# Supplementary material
Source: PubMed Central journal article supplement (PMC2766618)

Site-Specific DNA Structural and Dynamic Features Revealed by Nucleotide-  
Independent Nitroxide Probes

Anna M. Popova<sup>‡</sup>, Tamás Kálai<sup>§</sup>, Kálmán Hideg<sup>§</sup>, and Peter Z. Qin<sup>‡</sup>

<sup>‡</sup>Department of Chemistry, University of Southern California, Los Angeles, California, USA

<sup>§</sup>Institute of Organic and Medicinal Chemistry, University of Pécs, Pécs, Hungary

Supporting Information

**Figure S1:** MALDI-TOF spectrum of an R5a labeled DNA strand. Data for CS24\_24T\_R5a is shown. The measured mass (3901.73 Da) matches with the mass computed for the DNA strand with one R5a attached (3901.65 Da).

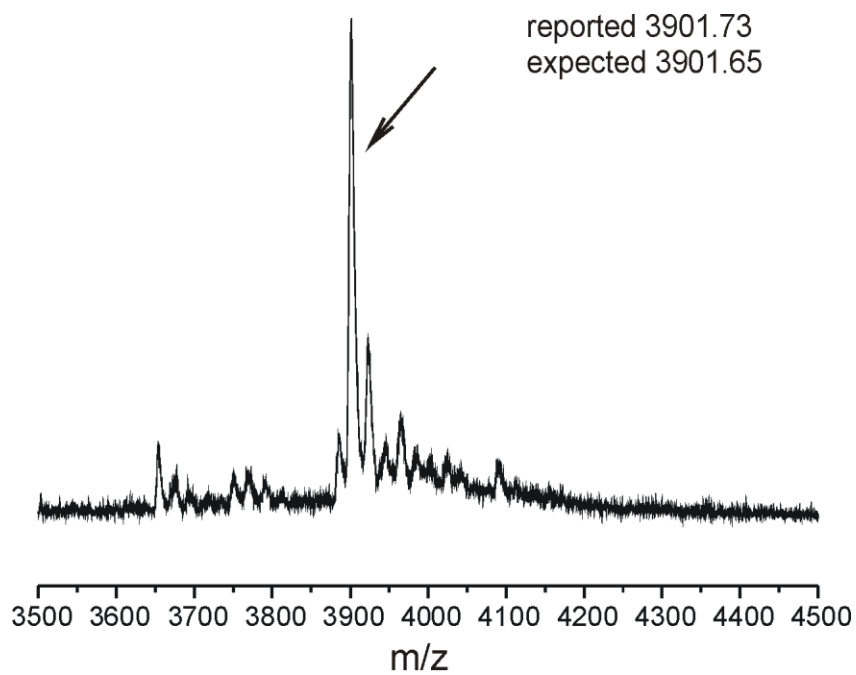

**Figure S2:** UV melting data for a wild type CS DNA and CS14\_R5a. Experimental data are shown with black circles, and simulated melting curves are shown with red lines. The fitting parameters are shown.

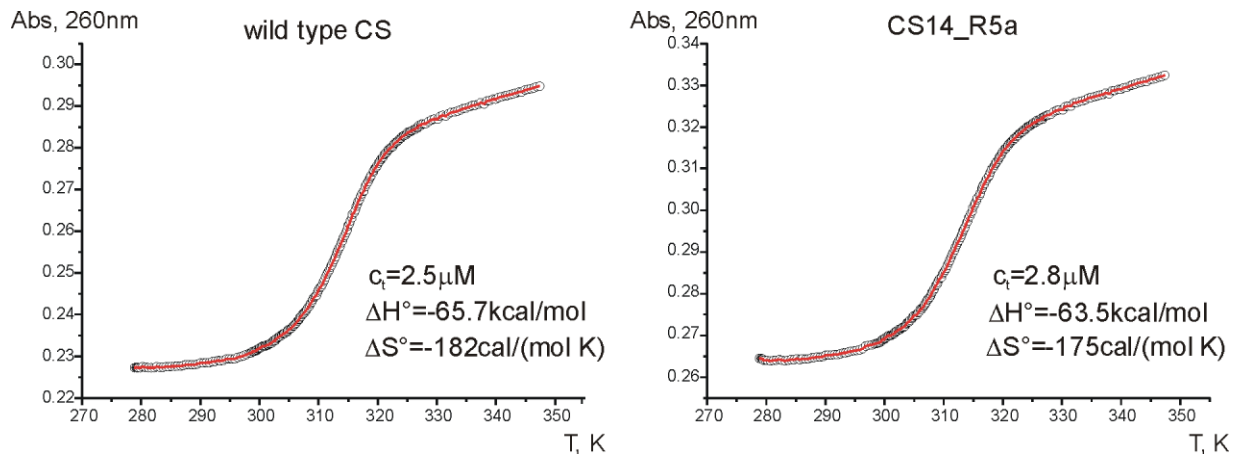

**Figure S3:** Reproducibility of CS 9\_R5 and CS2\_R5a spectra. (A) CS9\_R5\_1 and CS9\_R5\_2 samples were prepared from two different stocks of a phosphorothioate modified oligonucleotide (CS9). Their spectra were obtained 4-5 months apart. (B) CS2\_R5a\_1 and CS2\_R5a\_2 were prepared using the same stock of CS2, but different sucrose stocks. The spectra were obtained 2-2.5 years apart.

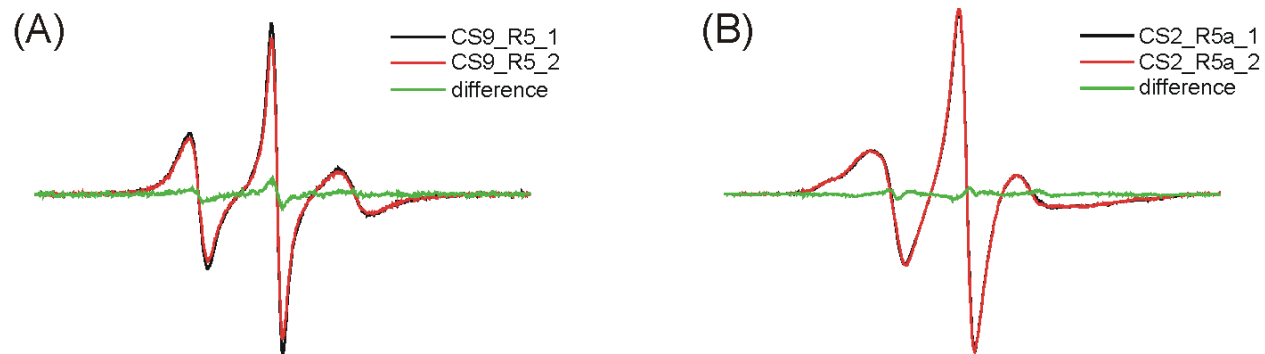

Supplement: NIHMS140964-supplement-Supporting_Information.pdf [file NIHMS140964-supplement-Supporting_Information.pdf]
